# Supplementary material
Source: PubMed Central journal article supplement (PMC5505341)
Supplement: NIHMS873998-supplement-1.pdf [file NIHMS873998-supplement-1.pdf]

## ONLINE VIDEOS

Supplemental video1.mov. **PKC- $\epsilon$  concentrates at phagocytic cups and on nascent phagosomes.**

BMDMs expressing PKC- $\epsilon$ -GFP were visualized with time during internalization of IgG-opsonized targets.

Supplemental video2.mov. **PIK93 reduces PKC- $\epsilon$  concentration at the cup and phagocytosis.**

BMDMs expressing PKC- $\epsilon$ -GFP were treated with DMSO (solvent control) or PIK-93 (10  $\mu$ M, 10 min) and visualized with time during internalization of IgG-opsonized targets. PIK93 reduces concentration at the cup but the flash on NP was retained (Quantitation presented in Figs 4 and S3).
