# Supplementary material
Source: PubMed Central journal article supplement (PMC5505341)
Supplement: NIHMS873998-supplement-2.pdf [file NIHMS873998-supplement-2.pdf]

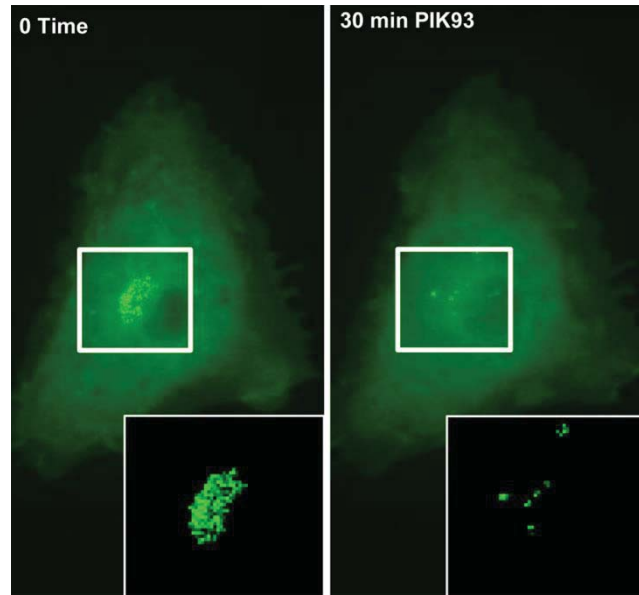

**Supplemental Figure 1. PIK93 removes PKC- $\epsilon$  from the Golgi.** Z stacks of BMDM expressing PKC- $\epsilon$ -GFP were taken before and after treatment with 0.1  $\mu$ M PIK93 (30 min, 37°C). The Z stacks were reconstructed and, after thresholding, a 3-D surface rendering of the perinuclear region (inset) was generated and overlayed on a single Z slice. PIK93 treatment substantively reduces Golgi-associated PKC- $\epsilon$ .

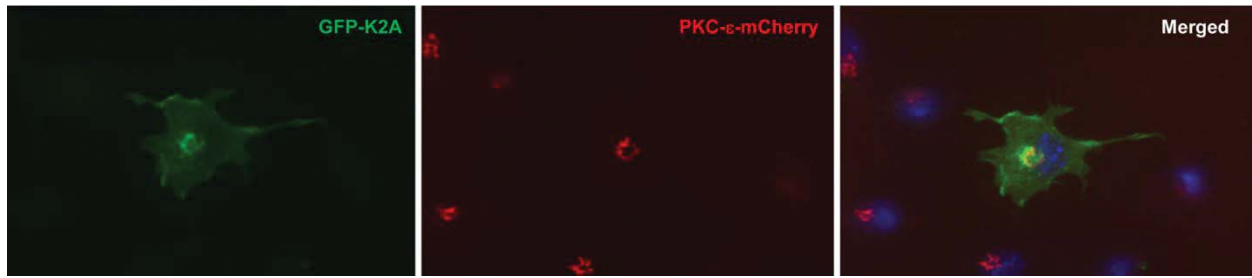

**Supplemental Figure 2. Perinuclear PKC- $\epsilon$  co-localizes with the Golgi marker, GM130.** RAW 264.7 cells expressing PKC- $\epsilon$ -GFP were fixed and stained for Golgi marker, GM130. A Pearson's correlation of 0.64 (25 cells from 4 independent experiments) corresponds to significant co-localization.

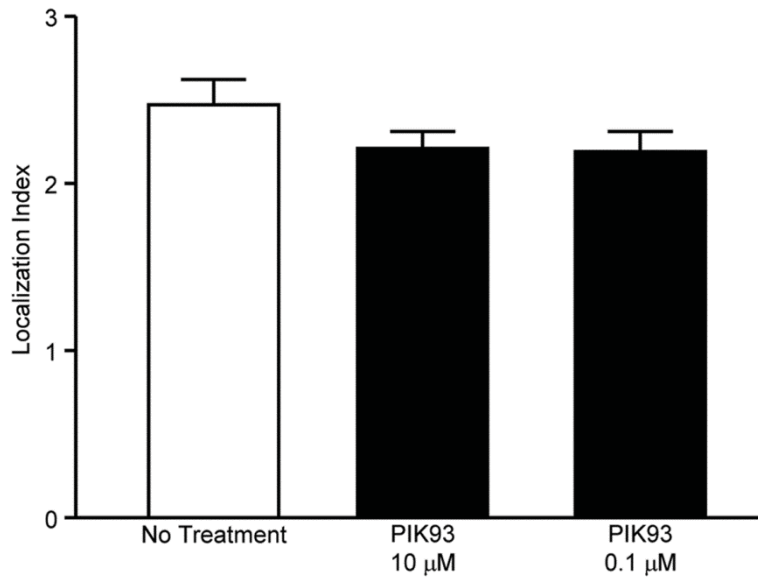

**Supplemental Figure 3. PIK93 does not alter PKC- $\epsilon$  concentration at nascent phagosomes.**

BMDM expressing PKC- $\epsilon$ -GFP were treated with the indicated concentrations of PIK93 (30 min, 37°C) and followed in real time during phagocytosis of IgG-opsonized beads. PKC- $\epsilon$  concentration at the nascent phagosome “flash” (i.e., when the pixel intensity was the highest) was quantified as in Methods. Neither concentration of PIK93 significantly altered the nascent phagosome-associated PKC- $\epsilon$  intensity. Data are presented as mean  $\pm$  SEM. Significance was tested by ANOVA with Bonferroni’s correction, no significance was found. 41-45 events compiled from 3 independent experiments. These are the same cells from which the phagocytic cup intensity was calculated (Fig 4B).
